# Supplementary material for: Accumulation of antibiotic-resistant genes in anaerobic biofilm reactor fed with household chemical products
Source: Springer Nature journal article supplement (doi:10.1007/s42452-020-3143-z), 2020-07-02
Supplement: MOESM1 [file 42452_2020_3143_MOESM1_ESM.doc]

**Supplementary data 1**

**Melting curve analysis of *ermC* genes in the ABR1 and ABR3 with respect to the *ermC* standards.** (Each colored line in the plot represents amplification curve of *ermC* gene in sample and standards)
